# Supplementary material for: Recorded poor insight as a predictor of service use outcomes: cohort study of patients with first-episode psychosis in a large mental healthcare database
Source: PubMed Central journal article supplement (PMC6577359; doi:10.1136/bmjopen-2019-028929), 2019-06-12
Supplement: bmjopen-2019-028929supp001.pdf [file bmjopen-2019-028929supp001.pdf]

**Supplementary Table 1:** Recorded insight and clinical outcomes at 12, 24, 36, 48 and 60 months

|                                                 | Recorded poor insight       |                              |
|-------------------------------------------------|-----------------------------|------------------------------|
|                                                 | Present<br>( <i>n</i> =991) | Absent<br>( <i>n</i> =1,035) |
| <b>12 months</b>                                |                             |                              |
| Psychiatric hospitalisation (%)                 | 33.76                       | 18.84                        |
| Compulsory hospitalisation (%)                  | 31.07                       | 12.37                        |
| Number of unique antipsychotics (mean, SD)      | 1.86 (1.17)                 | 1.34 (1.11)                  |
| Number of days spent as an inpatient (mean, SD) | 38.92 (61.85)               | 12.49 (36.05)                |
| <b>24 months</b>                                |                             |                              |
|                                                 | ( <i>n</i> =762)            | ( <i>n</i> =976)             |
| Psychiatric hospitalisation (%)                 | 44.88                       | 28.48                        |
| Compulsory hospitalisation (%)                  | 39.50                       | 20.29                        |
| Number of unique antipsychotics (mean, SD)      | 1.92 (1.44)                 | 1.90 (1.44)                  |
| Number of days spent as an inpatient (mean, SD) | 42.91 (89.96)               | 40.87 (88.93)                |
| <b>36 months</b>                                |                             |                              |
|                                                 | ( <i>n</i> =607)            | ( <i>n</i> =854)             |
| Psychiatric hospitalisation (%)                 | 49.26                       | 33.96                        |
| Compulsory hospitalisation (%)                  | 43.99                       | 25.18                        |
| Number of unique antipsychotics (mean, SD)      | 2.14 (1.63)                 | 2.06 (1.62)                  |
| Number of days spent as an inpatient (mean, SD) | 60.97 (125.71)              | 54.68 (118.76)               |
| <b>48 months</b>                                |                             |                              |
|                                                 | ( <i>n</i> =462)            | ( <i>n</i> =723)             |
| Psychiatric hospitalisation (%)                 | 53.68                       | 38.45                        |
| Compulsory hospitalisation (%)                  | 47.40                       | 28.63                        |
| Number of unique antipsychotics (mean, SD)      | 2.34 (1.74)                 | 2.16 (1.74)                  |

|                                                 |                |                |
|-------------------------------------------------|----------------|----------------|
| Number of days spent as an inpatient (mean, SD) | 77.75 (160.97) | 65.14 (146.18) |
| <b>60 months</b>                                | <i>(n=331)</i> | <i>(n=595)</i> |
| Psychiatric hospitalisation (%)                 | 56.19          | 41.51          |
| Compulsory hospitalisation (%)                  | 48.94          | 31.76          |
| Number of unique antipsychotics (mean, SD)      | 2.48 (1.83)    | 2.24 (1.85)    |
| Number of days spent as an inpatient (mean, SD) | 92.44 (196.73) | 74.01 (174.94) |

---
